# Supplementary material for: Wild Mesocarnivores as Reservoirs of Endoparasites Causing Important Zoonoses and Emerging Bridging Infections across Europe
Source: MDPI journal article supplement (doi:10.3390/pathogens12020178), 2023-01-23
Supplement: s1 [file s1]

Family Canidae

| Binomial name      |
|--------------------|
| Diet               |
| IUCN status        |
| Litter size        |
| Body weight        |
| Distribution range |

RED FOX

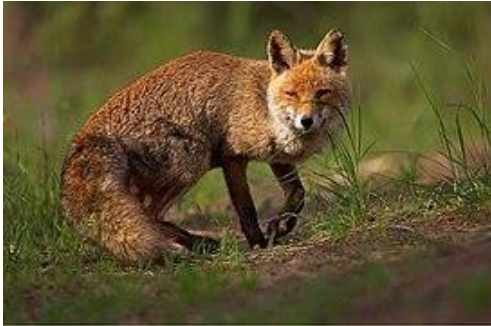

CC Martin Mecnarowski

GOLDEN JACKAL

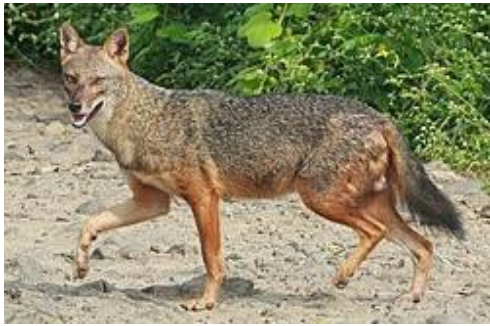

CC Shino Jacob Koottanad

RACCOON DOG

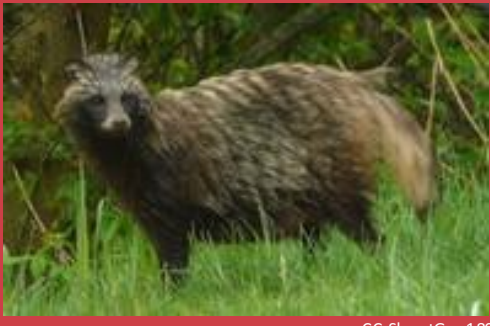

CC ShootGun180

|                                                                                    |                                                                                     |                                                                                      |
|------------------------------------------------------------------------------------|-------------------------------------------------------------------------------------|--------------------------------------------------------------------------------------|
| <i>Vulpes vulpes</i> Linnaeus, 1758                                                | <i>Canis aureus</i> Linnaeus, 1758                                                  | <i>Nyctreutes procyonoides</i> Gray, 1834                                            |
| Omnivore                                                                           | Omnivore                                                                            | Omnivore                                                                             |
| LC                                                                                 | LC                                                                                  | ALLOCHTHONOUS IN EUROPE                                                              |
| 3 - 12                                                                             | 1 - 8                                                                               | 4 - 9                                                                                |
| 3.4 kg - 8.7 kg                                                                    | 6.5 kg - 9.8 kg                                                                     | 2.9 kg - 12.5 kg                                                                     |
|  |  |  |

LC: least concern

# EUROPEAN WILDCAT

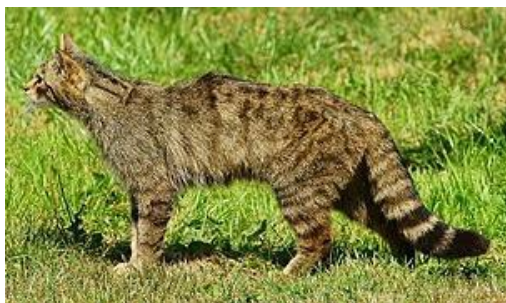

CC Peter Trimming

Family Felidae

Binomial name

*Felis silvestris* Schreber, 1777

Diet

Carnivore

IUCN status

LC

Litter size

2 – 4

Body weight

2 kg - 7.7 kg

Distribution range

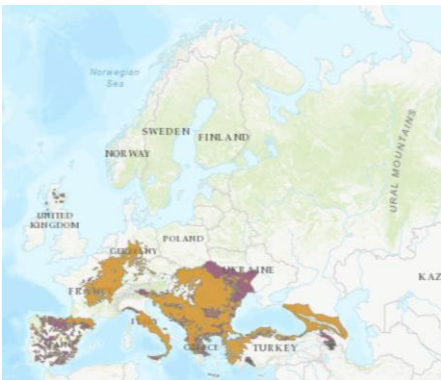

 RESIDENT  POSSIBLY RESIDENT

LC: *least concern*

|                                                                                                                                                                                      |                                                                                                                                                                                                                                                                                                                                                                                                                 |
|--------------------------------------------------------------------------------------------------------------------------------------------------------------------------------------|-----------------------------------------------------------------------------------------------------------------------------------------------------------------------------------------------------------------------------------------------------------------------------------------------------------------------------------------------------------------------------------------------------------------|
| <div>Family</div> <div>Procyonidae</div> <div>Binomial name</div> <div>Diet</div> <div>IUCN status</div> <div>Litter size</div> <div>Body weight</div> <div>Distribution range</div> | <div>RACCOON</div> <div>  <div>CC Don Loarie</div> </div> <div><i>Procyon lotor</i> Linnaeus, 1758</div> <div>Omnivore</div> <div>ALLOCHTHONOUS IN EUROPE</div> <div>1 – 7</div> <div>2 kg - 12 kg</div> <div>  <div>INTRODUCED</div> </div> |
|--------------------------------------------------------------------------------------------------------------------------------------------------------------------------------------|-----------------------------------------------------------------------------------------------------------------------------------------------------------------------------------------------------------------------------------------------------------------------------------------------------------------------------------------------------------------------------------------------------------------|



Family  
Mustelidae

EUROPEAN BADGER

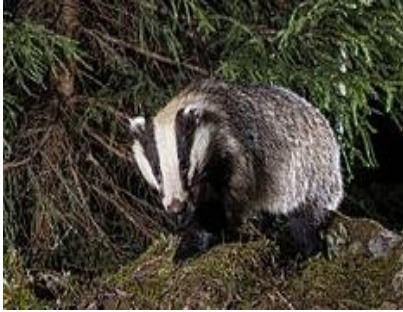

CC Trond Sæetre Stegarud

BEECH MARTEN

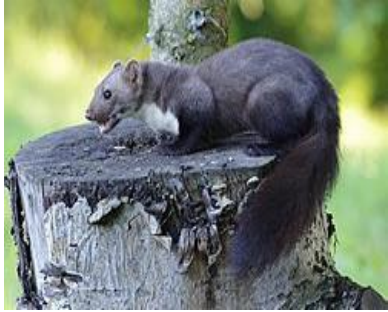

CC M.zlinko

PINE MARTEN

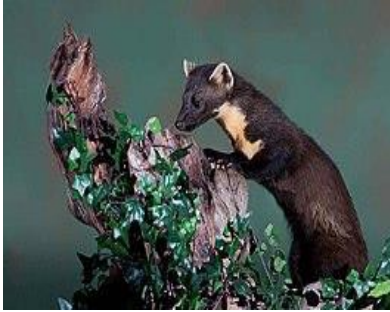

CC Ellis Lawrence

EURASIAN OTTER

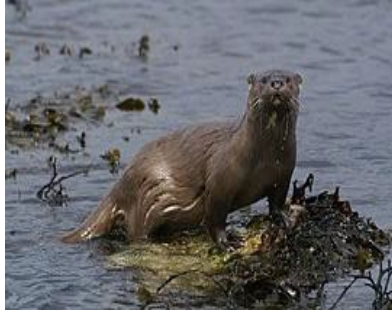

CC Mike Pennington

AMERICAN MINK

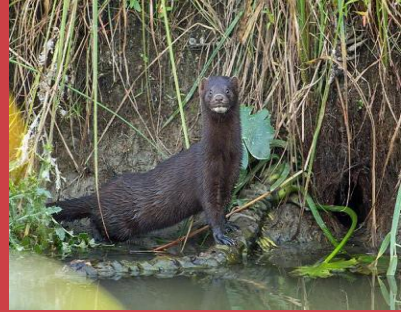

CC Christian Fisher

Binomial name

*Meles meles* Linnaeus, 1758

*Martes foina* Erxleben, 1777

*Martes martes* Linnaeus, 1758

*Lutra lutra* Linnaeus, 1758

*Neogale vison* Schreber, 1777

Diet

Omnivore

Omnivore

Omnivore

Carnivore

Carnivore

IUCN status

LC

LC

LC

NT

ALLOCHTHONOUS IN EUROPE

Litter size

2 - 6

3 - 8

2 - 8

4 - 9

2 - 10

Body weight

10 kg - 16 kg

1.1 kg – 2.3 kg

0.8 kg - 1.8 kg

5 kg - 14 kg

0.7 kg - 1 kg

Distribution  
range

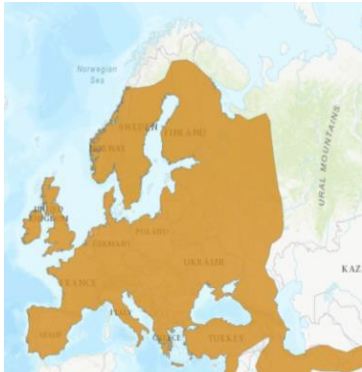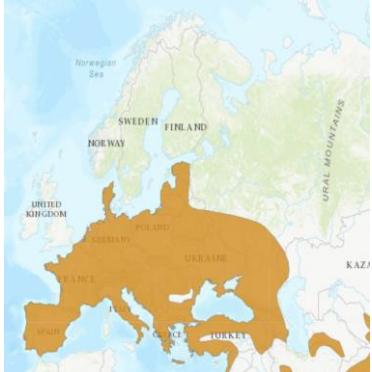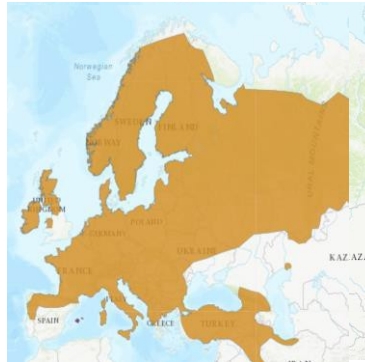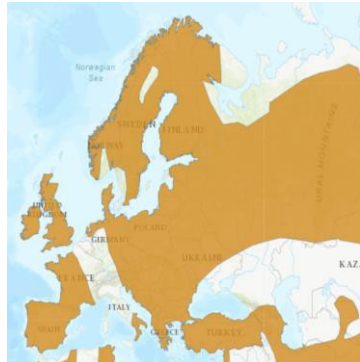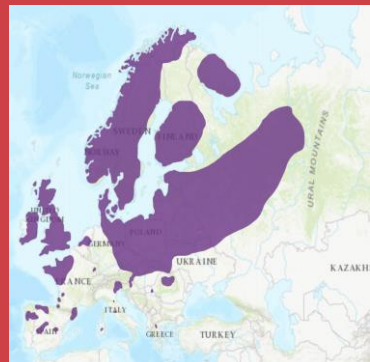

LC: least concern N.T: near threatened

RESIDENT INTRODUCED
